# Supplementary material for: Reliability of standard pupillometry practice in neurocritical care: an observational, double-blinded study
Source: PubMed Central journal article supplement (PMC4828754; doi:10.1186/s13054-016-1239-z), 2016-03-13

**Figure S2:** Pupillary asymmetry in healthy volunteers. Circles represent the difference between left and right pupil size (abscissa) and the mean left and right pupil size (ordinate) measured by the monocular pupillometer in 200 healthy volunteers.

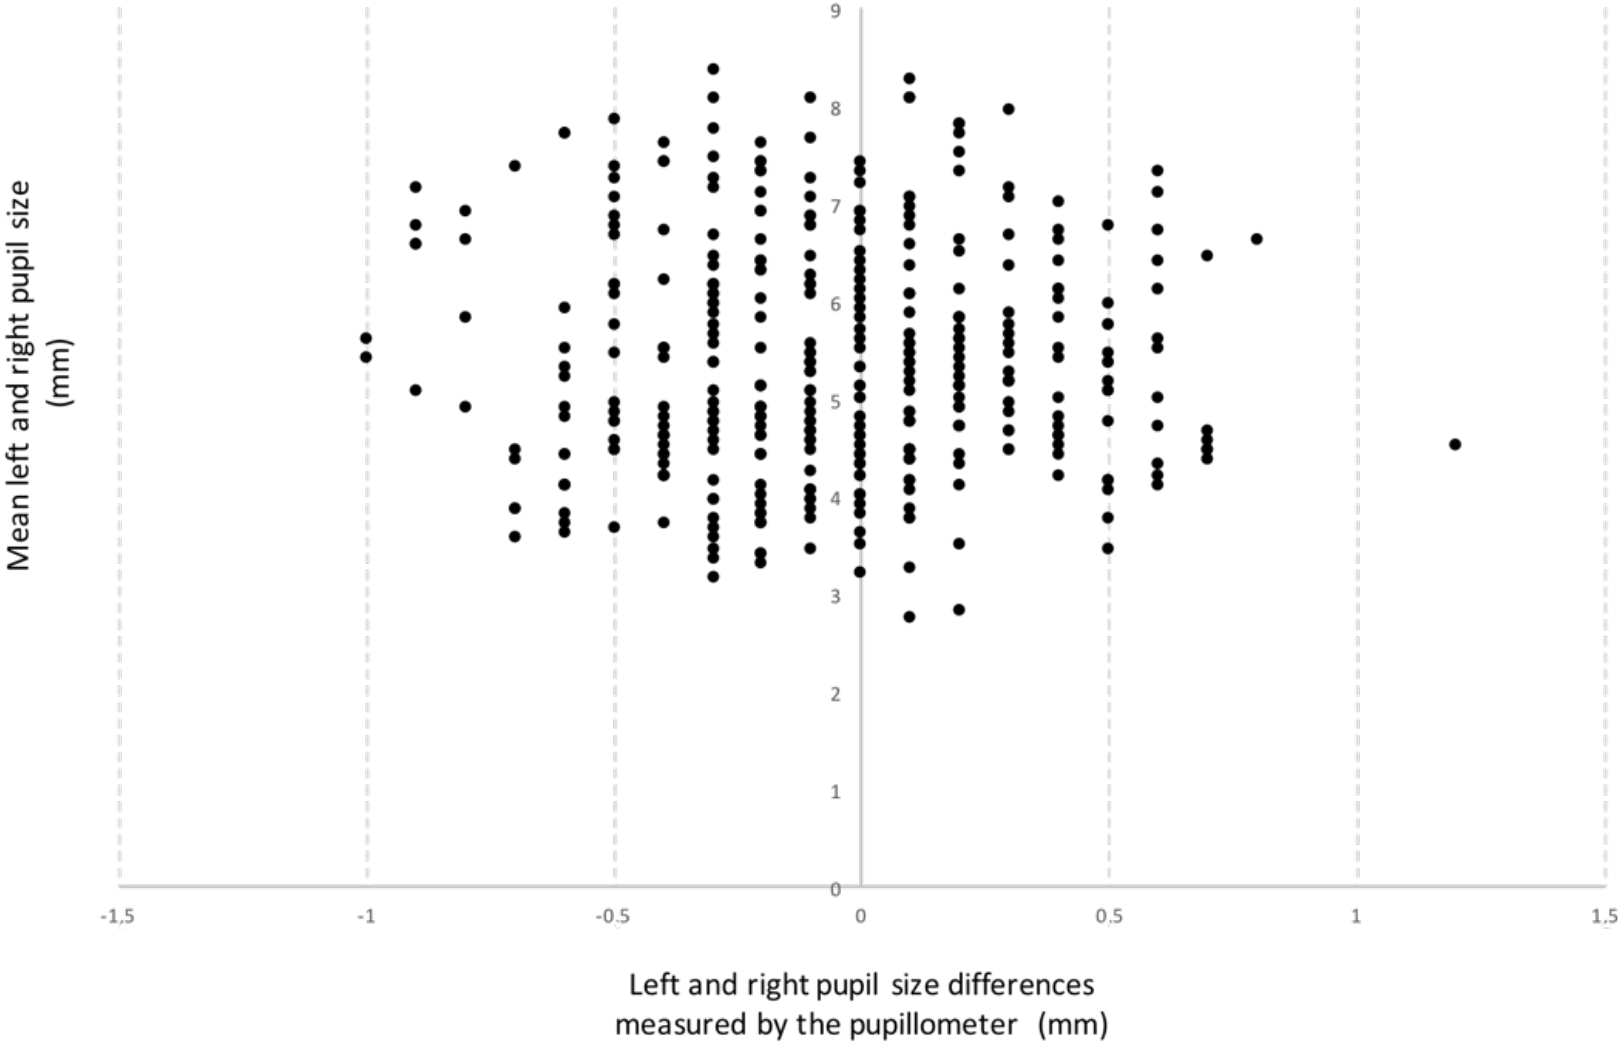

Supplement: 13054_2016_1239_MOESM2_ESM.pdf [file 13054_2016_1239_MOESM2_ESM.pdf]
