# Supplementary material for: Reliability of standard pupillometry practice in neurocritical care: an observational, double-blinded study
Source: PubMed Central journal article supplement (PMC4828754; doi:10.1186/s13054-016-1239-z), 2016-03-13

**Figure S3:** Maximum resting pupil size (A) and percentage of reduction in pupil size after light stimulation (B) measured with pupillometer in function of the average hourly sufentanil dosing requirement.

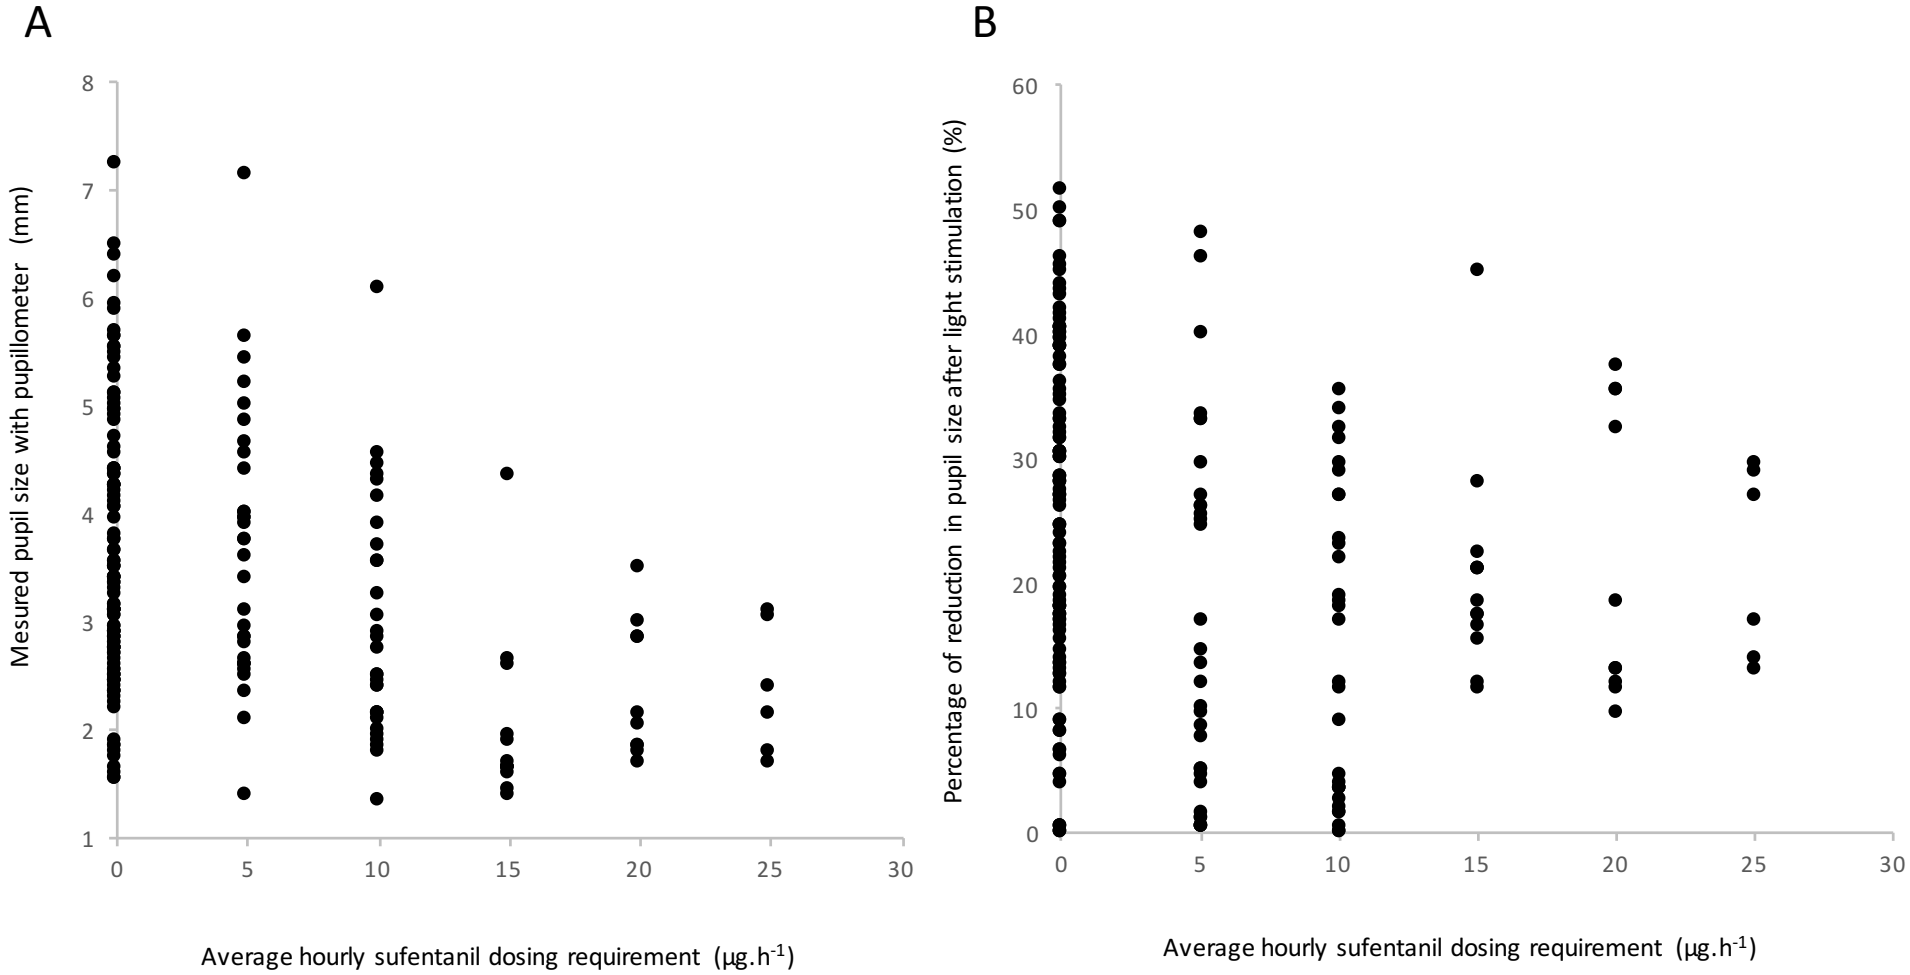

Supplement: 13054_2016_1239_MOESM3_ESM.pdf [file 13054_2016_1239_MOESM3_ESM.pdf]
