# Supplementary material for: Reliability of standard pupillometry practice in neurocritical care: an observational, double-blinded study
Source: PubMed Central journal article supplement (PMC4828754; doi:10.1186/s13054-016-1239-z), 2016-03-13

**Figure S4:** Bland–Altman plots for difference in pupil size estimates by nurses and automated pupillometer. Solid line, mean difference (bias); dotted lines, limit of agreement (bias± 1.96 SD).

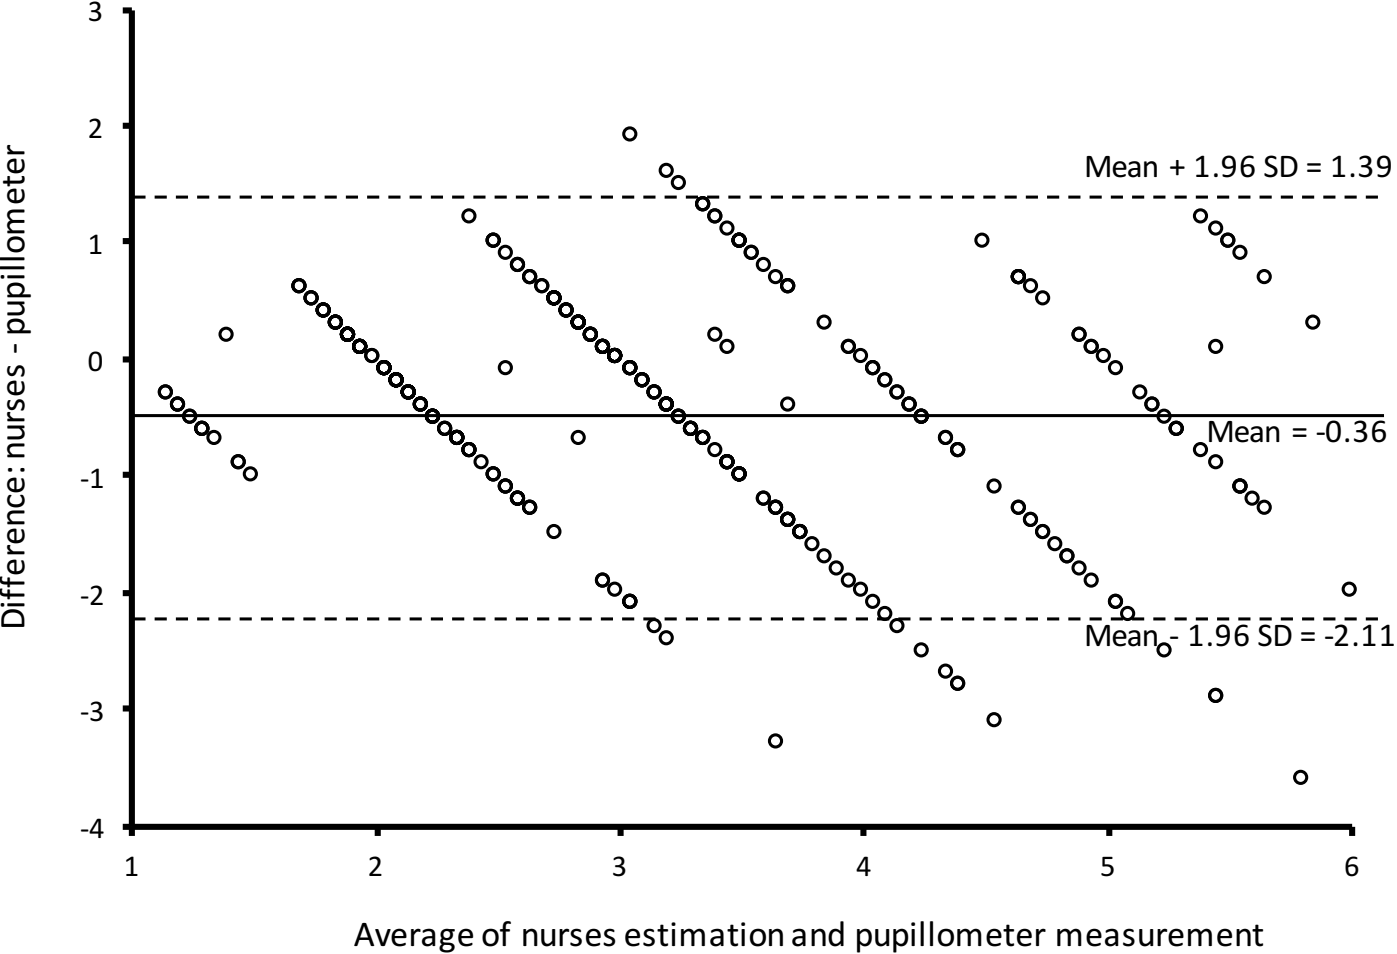

Supplement: 13054_2016_1239_MOESM4_ESM.pdf [file 13054_2016_1239_MOESM4_ESM.pdf]
