# Supplementary material for: Reliability of standard pupillometry practice in neurocritical care: an observational, double-blinded study
Source: PubMed Central journal article supplement (PMC4828754; doi:10.1186/s13054-016-1239-z), 2016-03-13
Supplement: 13054_2016_1239_MOESM5_ESM.pdf [file 13054_2016_1239_MOESM5_ESM.pdf]

**Table S1.** We found 12 cases with a specific medical management according to anisocoria detection.

| Cases | Age | Sex | Causes of NCCU admission                                                               | GCS admission | Opioid infusion when anisocoria daignosed | Sedative infusion when anisocoria | Clinical symptoms                               | Pupil asymmetry (mm) | Disagreement for anisocoria         | Type of anisocoria | Intervention                                                | Imaging results                                 | ICP (mmHg) | mRS outcome |
|-------|-----|-----|----------------------------------------------------------------------------------------|---------------|-------------------------------------------|-----------------------------------|-------------------------------------------------|----------------------|-------------------------------------|--------------------|-------------------------------------------------------------|-------------------------------------------------|------------|-------------|
| 1     | 20  | M   | Traumatic brain injury                                                                 | 12            | -                                         | -                                 | Confusing state                                 | 1.1                  | Anisocoria detected by pupillometer | Reactive           | Sedation with propofol and urgent CT brain scan             | Increased edema and midline shift               | -          | 0           |
| 2     | 61  | M   | Decompressive craniectomy for malignant infarction of the right middle cerebral artery | 3             | -                                         | -                                 | Altered consciousness                           | 1.3                  | Anisocoria detected by pupillometer | Reactive           | Sedation with propofol and urgent CT brain scan             | Increased cerbral hernia and midline shift      | -          | 3           |
| 4     | 61  | F   | Spontaneous cerebral haematoma                                                         | 7             | +                                         | +                                 | Non evaluable due to therapeutical sedation     | 0.2                  | Anisocoria detected by nurse        | Areactive          | Intracranial pressure monitorage                            |                                                 | 5          | 6           |
| 5     | 40  | F   | Subarachnoid hemorrhage                                                                | 15            | -                                         | -                                 | Delayed ischemic neurological deficit           | 1.8                  | Anisocoria detected by pupillometer | Areactive          | Urgent MRI                                                  | Left temoral Ischemia                           | -          | 1           |
| 6     | 18  | F   | Mesencephalic pilocytic astrocytoma                                                    | 10            | +                                         | +                                 | Altered consciousness with aspiration pneumonia | 1.1                  | Anisocoria detected by pupillometer | Areactive          | Neursurgeon examination                                     | NA                                              | -          | 4           |
| 7     | 15  | F   | Traumatic Brain Injury                                                                 | 5             | +                                         | +                                 | Non evaluable due to therapeutical sedation     | 0.4                  | Anisocoria detected by nurse        | Areactive          | CT scan                                                     | Right temporal contusion                        | 8          | 5           |
| 8     | 73  | M   | Intra cranial hemmorhage under AVK                                                     | 9             | -                                         | -                                 | Altered consciousness                           | 0.6                  | Anisocoria detected by nurse        | Reactive           | Neurosurgeon examination                                    | 0                                               | -          | 5           |
| 9     | 56  | M   | Subarachnoid hemorrhage                                                                | 15            | -                                         | -                                 | Altered consciousness                           | 0.2                  | Anisocoria detected by nurse        | Areactive          | Ct scan declampage                                          | Hydrocephaly                                    | -          | 6           |
| 10    | 61  | M   | Frontal Abscess                                                                        | 3             | -                                         | +                                 | No evaluable due to therapeutical sedation      | 0.3                  | Anisocoria detected by nurse        | Areactive          | Sedative infusion and CT scan Mannitol before surgical cure | Frontal abcess with subfalcline herniation      | -          | 1           |
| 11    | 57  | M   | Intra cranial Hemorrhage                                                               | 3             | -                                         | -                                 | Altered consciousness                           | 0.5                  | Anisocoria detected by nurse        | Areactive          | Sedative infusion, CT scan                                  | Rebleeding with mass effect                     | -          | 6           |
| 12    | 64  | F   | Spontaneous cerebral haematoma                                                         | 3             | +                                         | +                                 | Non evaluable due to therapeutical sedation     | 1.2                  | Anisocoria detected by pupillometer | Areactive          | Urgent CT scan                                              | Hemorrhage growth with mesencephalon infarction | 25         | 6           |
