# Supplementary material for: Reliability of standard pupillometry practice in neurocritical care: an observational, double-blinded study
Source: Springer Nature journal article supplement (doi:10.1186/s13054-016-1239-z), 2016-03-13

**Figure S1:** A) NeuroLight Algiscan quantitative pupillometer (IDMED, Marseille, France); B) Pupillary reactivity assessment using the electronic pupillometer showing the real-time automatic detection of the pupil (green circle) with its corresponding size (2.92 mm); C) Liquid crystal display screen after the assessment of the PLR showing the pupillogram with the three phases of pupillary reaction: 1) the pupillometer measures the pupil during a 200-milliseconds period to determine the baseline pupil size (yellow line); 2) then starts the light stimulus during a 1-second period and 3) measures the pupil reactivity curve over the subsequent 3-seconds to determine the minimal pupil size (white line).

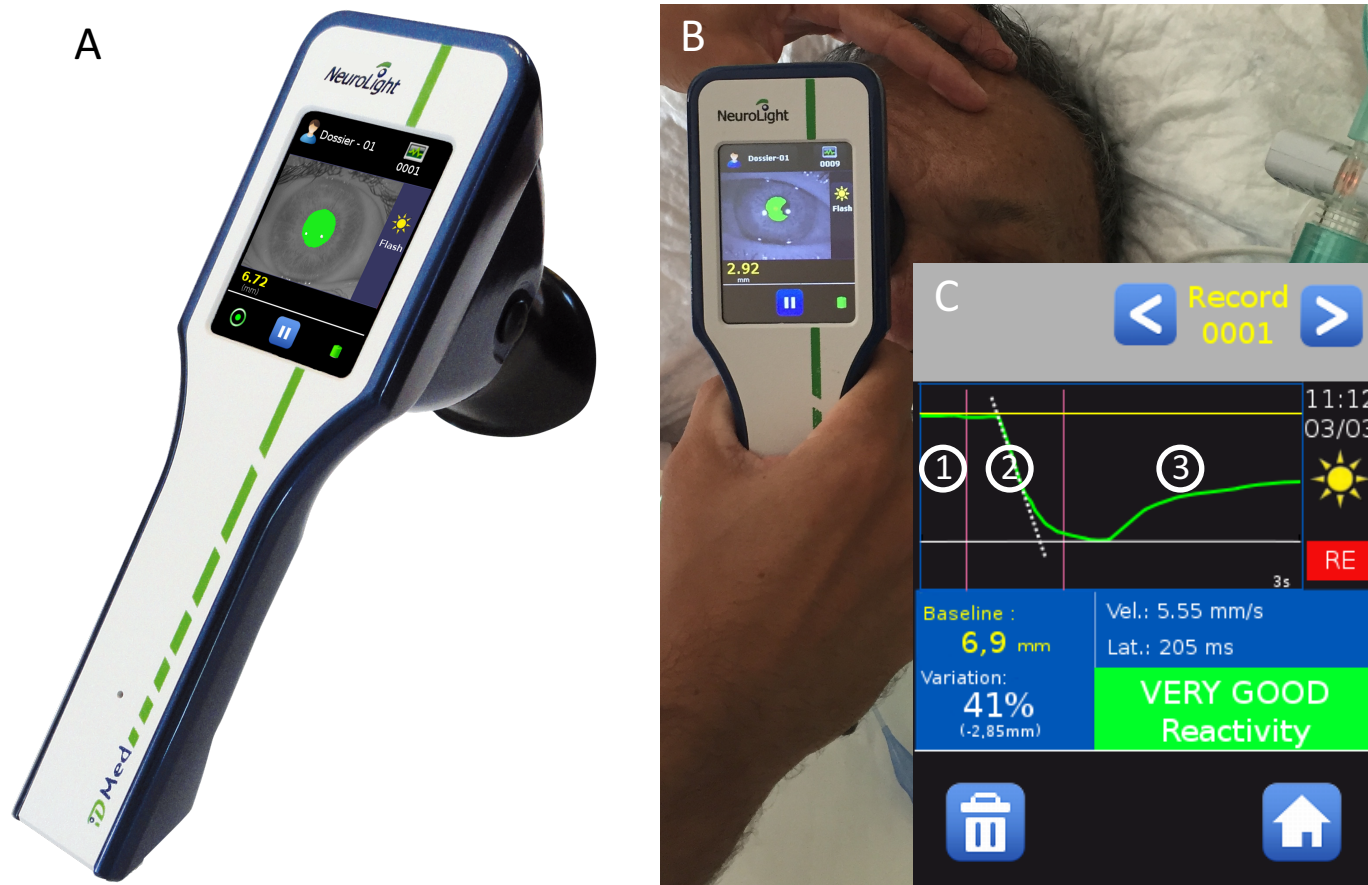

Supplement: MOESM1 [file 10027988]
